# Supplementary material for: Childcare Stress, Burnout, and Intent to Reduce Hours or Leave the Job During the COVID-19 Pandemic Among US Health Care Workers
Source: PubMed Central journal article supplement (PMC9294994; doi:10.1001/jamanetworkopen.2022.21776), 2022-07-18
Supplement: jamanetwopen-e2221776-s001.pdf [file jamanetwopen-e2221776-s001.pdf]

## Supplemental Online Content

Harry EM, Carlasare LE, Sinsky CA, et al. Childcare stress, burnout, and intent to reduce hours or leave the job during the COVID-19 pandemic among US health care workers. *JAMA Netw Open*. 2022;5(7):e2221776. doi:10.1001/jamanetworkopen.2022.21776

### **eAppendix.** Survey Questions

**eTable 1.** Multivariate (Logit) Models of Burnout Predictors Including Differential Effect (Interaction Term) of Gender and Childcare Stress

**eTable 2.** Multivariate (Logit) Models of Predictors of Likelihood to Reduce Hours Including Differential Effect (Interaction Term) of Gender and Childcare Stress

**eTable 3.** Multivariate (Logit) Models of Predictors of Likelihood to Leave Practice Including Differential Effect (Interaction Term) of Gender and Childcare Stress

**eTable 4.** Multivariate (Logit) Models of Predictors of Anxiety and Depression Including Differential Effect (Interaction Term) of Gender and Childcare Stress

This supplemental material has been provided by the authors to give readers additional information about their work.

## **eAppendix. Survey Questions**

### **The stress I experienced today is**

- a. Minimal
- b. Modest
- c. High
- d. Very high

### **I worry about exposing myself and my family to COVID**

- a. Not at all
- b. Somewhat
- c. Moderately
- d. To a great extent

### **Due to the impact of COVID 19, I am experiencing the following:**

- a. Anxiety or depression [not at all, somewhat, moderately, to a great extent]
- b. Work overload [not at all, somewhat, moderately, to a great extent]
- c. Concerns about childcare [not at all, somewhat, moderately, to a great extent]
- d. Worries that I have had to do things at work that compromise my integrity [not at all, somewhat, moderately, to a great extent]

### **Being part of the COVID-19 response has increased my sense of meaning and purpose**

- a. Not at all
- b. Somewhat
- c. Moderately
- d. To a great extent

### **I feel valued by my organization**

- a. Not at all
- b. Somewhat
- c. Moderately
- d. To a great extent

**Using your own definition of “burnout,” please choose one of the answers below:**

- a. I enjoy my work. I have no symptoms of burnout
- b. I am under stress, and don't always have as much energy as I did, but I don't feel burned out.
- c. I am beginning to burn out and have one or more symptoms of burnout, e.g. emotional exhaustion
- d. The symptoms of burnout that I am experiencing won't go away. I think about work frustrations a lot.
- e. I feel completely burned out. I am at a point where I may need to seek help

Work Plans

**What is the likelihood that you will reduce the number of hours you devote to clinical care over the next 12 months?**

- a. None
- b. Slight
- c. Moderate
- d. Likely
- e. Definitely

**What is the likelihood that you would leave your practice within two years?**

- a. None
- b. Slight
- c. Moderate
- d. Likely
- e. Definitely

eTable 1. Multivariate (Logit) Models of Burnout Predictors Including Differential Effect (Interaction Term) of Gender and Childcare Stress

|                      | Model 1<br>Full Sample N = 35, 998 |         |                      |                       | Model 2<br>Full Sample N = 35, 998 |         |                      |                       |
|----------------------|------------------------------------|---------|----------------------|-----------------------|------------------------------------|---------|----------------------|-----------------------|
|                      | AOR<br>[95% CI]                    | p-value | ARR<br>[95% CI]      | ARD<br>[95% CI]       | AOR<br>[95% CI]                    | p-value | ARR<br>[95% CI]      | ARD<br>[95% CI]       |
| Sex                  |                                    |         |                      |                       |                                    |         |                      |                       |
| Female               | 1.49<br>[1.41, 1.57]               | < 0.001 | 1.22<br>[1.18, 1.25] | 9.6%<br>[8.3, 10.8]   | 1.50<br>[1.42, 1.59]               | <0.001  | 1.22<br>[1.18, 1.25] | 9.6%<br>[8.3, 10.8]   |
| Childcare risk       |                                    |         |                      |                       |                                    |         |                      |                       |
| High risk            | 1.80<br>[1.70, 1.90]               | < 0.001 | 1.30<br>[1.27, 1.33] | 14.2%<br>[12.9, 15.4] | 1.86<br>[1.68, 2.06]               | <0.001  | 1.30<br>[1.27, 1.33] | 14.2%<br>[12.9, 15.4] |
| Sex X Childcare risk |                                    |         |                      |                       |                                    |         |                      |                       |
| Female X High risk   |                                    |         |                      |                       | 0.95<br>[0.84, 1.07]               | 0.412   | 1.14<br>[1.09, 1.20] | 8.46%<br>[5.9, 11.0]  |
| Constant             | 0.39<br>[.26, .58]                 | <0.001  |                      |                       | 0.38<br>[.26, .57]                 | <0.001  | ARR<br>[95% CI]      | ARD<br>[95% CI]       |
| MZ-R2                | 0.053                              |         |                      |                       | 0.053                              |         |                      |                       |

AOR = adjusted odds ratio, ARR = adjusted risk ratio, ARD = adjusted risk difference, MZ-R2 = McKelvey and Zavoina's pseudo R2.

(a) = adjusted for specialty, years in practice, and role. (Interaction term) = females are 1.14 times more likely (14% more likely) to have higher burnout than males when they experience higher childcare stress, by 8.46%.

|                | Model 3<br>Physicians only<br>N = 12,888 |         |                      |                      | Model 4<br>Physicians only<br>N = 12,888 |         |                      |                      |
|----------------|------------------------------------------|---------|----------------------|----------------------|------------------------------------------|---------|----------------------|----------------------|
|                | AOR<br>[95% CI]                          | p-value | ARR<br>[95% CI]      | ARD<br>[95% CI]      | AOR<br>[95% CI]                          | p-value | ARR<br>[95% CI]      | ARD<br>[95% CI]      |
| Sex            |                                          |         |                      |                      |                                          |         |                      |                      |
| Female         | 1.54<br>[1.43, 1.67]                     | < 0.001 | 1.25<br>[1.20, 1.30] | 10.4%<br>[8.6, 12.2] | 1.56<br>[1.43, 1.70]                     | <0.001  | 1.25<br>[1.20, 1.30] | 10.4%<br>[8.6, 12.2] |
| Childcare risk |                                          |         |                      |                      |                                          |         |                      |                      |

|                      |                      |         |                      |                       |                      |        |                      |                       |
|----------------------|----------------------|---------|----------------------|-----------------------|----------------------|--------|----------------------|-----------------------|
| High risk            | 1.92<br>[1.75, 2.10] | < 0.001 | 1.37<br>[1.32, 1.43] | 15.8%<br>[13.6, 17.9] | 1.97<br>[1.73, 2.24] | <0.001 | 1.37<br>[1.32, 1.43] | 15.8%<br>[13.6, 17.9] |
| Sex X Childcare risk |                      |         |                      |                       |                      |        |                      |                       |
| Female X High risk   |                      |         |                      |                       | 0.95<br>[0.80, 1.13] | 0.605  | 1.17<br>[1.10, 1.25] | 9.5%<br>[5.8, 13.2]   |
| Constant             | 0.28<br>[.14, .56]   | <0.001  |                      |                       | 0.28<br>[.14, .56]   | <0.001 |                      |                       |
| MZ-R2                | 0.060                |         |                      |                       | 0.060                |        |                      |                       |

AOR = adjusted odds ratio, ARR = adjusted risk ratio, ARD = adjusted risk difference, MZ-R2 = McKelvey and Zavoina's pseudo R2.

(a) = adjusted for specialty, years in practice, and role. (Interaction term) = females are 1.17 times more likely (17% more likely) to have higher burnout than males when they experience higher childcare stress, by 9.5%.

eTable 2. Multivariate (Logit) Models of Predictors of Likelihood to Reduce Hours Including Differential Effect (Interaction Term) of Gender and Childcare Stress

|                      | Model 1<br>Full Sample<br>N = 15,807 |         |                      |                       | Model 2<br>Full Sample<br>N = 15,807 |         |                      |                       |
|----------------------|--------------------------------------|---------|----------------------|-----------------------|--------------------------------------|---------|----------------------|-----------------------|
|                      | AOR<br>[95% CI]                      | p-value | ARR<br>[95% CI]      | ARD<br>[95% CI]       | AOR<br>[95% CI]                      | p-value | ARR<br>[95% CI]      | ARD<br>[95% CI]       |
| Sex                  |                                      |         |                      |                       |                                      |         |                      |                       |
| Female               | 1.11<br>[1.02, 1.20]                 | < 0.001 | 1.07<br>[1.01, 1.13] | 2.1%<br>[.45, 3.8]    | 1.06<br>[0.97, 1.16]                 | 0.185   | 1.07<br>[1.01, 1.13] | 2.1%<br>[.45, 3.8]    |
| Childcare risk       |                                      |         |                      |                       |                                      |         |                      |                       |
| High risk            | 1.91<br>[1.76, 2.08]                 | < 0.001 | 1.52<br>[1.44, 1.60] | 14.1%<br>[12.2, 16.0] | 1.71<br>[1.48, 1.97]                 | <0.001  | 1.52<br>[1.44, 1.60] | 14.1%<br>[12.2, 16.0] |
| Sex X Childcare risk |                                      |         |                      |                       |                                      |         |                      |                       |
| Female X High risk   |                                      |         |                      |                       | 1.18<br>[1.00, 1.40]                 | 0.050   | 1.06<br>[1.01, 1.12] | 2.4%<br>[.52, 4.3]    |
| Constant             | 0.17<br>[.08, .38]                   | <0.001  |                      |                       | 0.18<br>[.08, .39]                   | <0.001  |                      |                       |
| MZ-R2                | 0.059                                |         |                      |                       | 0.055                                |         |                      |                       |

AOR = adjusted odds ratio, ARR = adjusted risk ratio, ARD = adjusted risk difference, MZ-R2 = McKelvey and Zavoina's pseudo R2.

(a) = adjusted for specialty, years in practice, and role. (Interaction term) = females are 1.06 times more likely (6% more likely) to have higher burnout than males when they experience higher childcare stress, by 2.4%.

|        | Model 3<br>Physicians only<br>N = 8,722 |         |                 |                 | Model 4<br>Physicians only<br>N = 8,722 |         |                 |                 |
|--------|-----------------------------------------|---------|-----------------|-----------------|-----------------------------------------|---------|-----------------|-----------------|
|        | AOR<br>[95% CI]                         | p-value | ARR<br>[95% CI] | ARD<br>[95% CI] | AOR<br>[95% CI]                         | p-value | ARR<br>[95% CI] | ARD<br>[95% CI] |
| Sex    |                                         |         |                 |                 |                                         |         |                 |                 |
| Female | 1.07                                    | 0.149   | 1.05            | 1.5%            | 1.01                                    | 0.841   | 1.05            | 1.5%            |

|                      |                      |         |                      |                       |                      |        |                      |                       |
|----------------------|----------------------|---------|----------------------|-----------------------|----------------------|--------|----------------------|-----------------------|
|                      | [0.97, 1.19]         |         | [0.98, 1.12]         | [-.55, 3.6]           | [0.90, 1.13]         |        | [0.98, 1.12]         | [-.55, 3.6]           |
| Childcare risk       |                      |         |                      |                       |                      |        |                      |                       |
| High risk            | 1.92<br>[1.71, 2.15] | <0.001  | 1.51<br>[1.41, 1.62] | 14.1%<br>[11.6, 16.7] | 1.71<br>[1.46, 2.00] | <0.001 | 1.51<br>[1.41, 1.62] | 14.1%<br>[11.6, 16.7] |
| Sex X Childcare risk |                      |         |                      |                       |                      |        |                      |                       |
| Female X High risk   |                      |         |                      |                       | 1.26<br>[1.01, 1.56] | 0.033  | 1.14<br>[1.03, 1.27] | 5.7%<br>[1.3, 10.1]   |
| Constant             | 0.22<br>[.06, .72]   | < 0.001 |                      |                       | 0.22<br>[.06, .72]   | 0.013  |                      |                       |
| MZ-R2                | 0.051                |         |                      |                       | 0.052                |        |                      |                       |

AOR = adjusted odds ratio, ARR = adjusted risk ratio, ARD = adjusted risk difference, MZ-R2 = McKelvey and Zavoina's pseudo R2.

(a) = adjusted for specialty, and years in practice. (Interaction term) = females are 1.14 times more likely (14% more likely) to have higher burnout than males when they experience higher childcare stress, by 5.7%.

eTable 3. Multivariate (Logit) Models of Predictors of Likelihood to Leave Practice Including Differential Effect (Interaction Term) of Gender and Childcare Stress

|                      | Model 1<br>Full Sample<br>N = 15,997 |         |                      |                      | Model 2<br>Full Sample<br>N = 15,997 |         |                      |                      |
|----------------------|--------------------------------------|---------|----------------------|----------------------|--------------------------------------|---------|----------------------|----------------------|
|                      | AOR<br>[95% CI]                      | p-value | ARR<br>[95% CI]      | ARD<br>[95% CI]      | AOR<br>[95% CI]                      | p-value | ARR<br>[95% CI]      | ARD<br>[95% CI]      |
| Sex                  |                                      |         |                      |                      |                                      |         |                      |                      |
| Female               | 0.97<br>[0.89, 1.06]                 | 0.639   | 0.98<br>[0.92, 1.04] | .86%<br>[-0.20, 1.2] | 0.95<br>[0.87, 1.05]                 | 0.390   | 0.98<br>[0.92, 1.04] | -.38%<br>[-2.0, 1.3] |
| Childcare risk       |                                      |         |                      |                      |                                      |         |                      |                      |
| High risk            | 1.28<br>[1.17, 1.40]                 | <0.001  | 1.18<br>[1.12, 1.25] | 4.9%<br>[3.2, 6.7]   | 1.20<br>[1.03, 1.40]                 | 0.017   | 1.18<br>[1.12, 1.25] | 4.8%<br>[3.0, 6.6]   |
| Sex X Childcare risk |                                      |         |                      |                      |                                      |         |                      |                      |
| Female X High risk   |                                      |         |                      |                      | 1.10<br>[0.917, 1.32]                | 0.302   | 1.03<br>[.92, 1.16]  | 1.0%<br>[-2.1, 4.2]  |
| Constant             | 0.26<br>[.12, .54]                   | <0.001  |                      |                      | 0.26<br>[.13, .55]                   | <0.001  |                      |                      |
| MZ-R2                | 0.062                                |         |                      |                      | 0.062                                |         |                      |                      |

AOR = adjusted odds ratio, ARR = adjusted risk ratio, ARD = adjusted risk difference, MZ-R2 = McKelvey and Zavoina's pseudo R2.

(b) = adjusted for specialty, years in practice, and role. (Interaction term) = females are 1.03 times more likely (3% more likely) to have higher burnout than males when they experience higher childcare stress, by 1.0%.

|        | Model 3<br>Physicians only<br>N = 8,743 |         |                 |                     | Model 4<br>Physicians only<br>N = 8,743 |         |                      |                     |
|--------|-----------------------------------------|---------|-----------------|---------------------|-----------------------------------------|---------|----------------------|---------------------|
|        | AOR<br>[95% CI]                         | p-value | ARR<br>[95% CI] | ARD<br>[95% CI]     | AOR<br>[95% CI]                         | p-value | ARR<br>[95% CI]      | ARD<br>[95% CI]     |
| Sex    |                                         |         |                 |                     |                                         |         |                      |                     |
| Female | 0.97<br>[0.82, 1.09]                    | 0.681   | 0.98            | -.40<br>[-2.7, 1.4] | 0.96<br>[0.84, 1.09]                    | 0.587   | 0.98<br>[0.90, 1.06] | -.40<br>[-2.7, 1.4] |

|                      |                      |        |                      |                    |                      |        |                      |                     |
|----------------------|----------------------|--------|----------------------|--------------------|----------------------|--------|----------------------|---------------------|
|                      |                      |        | [0.90, 1.06]         |                    |                      |        |                      |                     |
| Childcare risk       |                      |        |                      |                    |                      |        |                      |                     |
| High risk            | 1.51<br>[1.32, 1.72] | <0.001 | 1.33<br>[1.22, 1.46] | 7.2%<br>[4.8, 9.6] | 1.47<br>[1.23, 1.76] | <0.001 | 1.33<br>[1.22, 1.46] | 7.2%<br>[4.8, 9.6]  |
| Sex X Childcare risk |                      |        |                      |                    |                      |        |                      |                     |
| Female X High risk   |                      |        |                      |                    | 1.04<br>[0.82, 1.34] | 0.699  | 1.00<br>[0.87, 1.16] | .25%<br>[-3.8, 4.3] |
| Constant             | 0.29<br>[.08, 1.02]  | 0.054  |                      |                    | 0.29<br>[.08, 1.02]  | 0.055  |                      |                     |
| MZ-R2                | 0.085                |        |                      |                    | 0.086                |        |                      |                     |

AOR = adjusted odds ratio, ARR = adjusted risk ratio, ARD = adjusted risk difference, MZ-R2 = McKelvey and Zavoina's pseudo R2.

(a) = adjusted for specialty, years in practice, and role. (Interaction term) = females are 1.00 times more likely (0% more likely) to have higher burnout than males when they experience higher childcare stress, by 0.25%.

eTable 4. Multivariate (Logit) Models of Predictors of Anxiety and Depression Including Differential Effect (Interaction Term) of Gender and Childcare Stress

|                      | Model 1<br>Full Sample<br>N = 39,757 |         |                      |                       | Model 2<br>Full Sample<br>N = 39,757 |         |                      |                       |
|----------------------|--------------------------------------|---------|----------------------|-----------------------|--------------------------------------|---------|----------------------|-----------------------|
|                      | AOR<br>[95% CI]                      | p-value | ARR<br>[95% CI]      | ARD<br>[95% CI]       | AOR<br>[95% CI]                      | p-value | ARR<br>[95% CI]      | ARD<br>[95% CI]       |
| Sex                  |                                      |         |                      |                       |                                      |         |                      |                       |
| Female               | 1.56<br>[1.47, 1.65]                 | < 0.001 | 1.33<br>[1.28, 1.38] | 9.2%<br>[8.1, 10.4]   | 1.62<br>[1.52, 1.73]                 | <0.001  | 1.33<br>[1.28, 1.38] | 9.2%<br>[8.1, 10.4]   |
| Childcare risk       |                                      |         |                      |                       |                                      |         |                      |                       |
| High risk            | 2.15<br>[2.04, 2.26]                 | < 0.001 | 1.55<br>[1.51, 1.59] | 17.2%<br>[16.0, 18.4] | 2.43<br>[2.19, 2.70]                 | <0.001  | 1.55<br>[1.51, 1.59] | 17.2%<br>[16.0, 18.4] |
| Sex X Childcare risk |                                      |         |                      |                       |                                      |         |                      |                       |
| Female X High risk   |                                      |         |                      |                       | 0.85<br>[0.75, 0.95]                 | 0.007   | 1.18<br>[1.11, 1.24] | 7.9%<br>[5.4, 10.4]   |
| Constant             | 0.17<br>[.11, .25]                   | < 0.001 |                      |                       | 0.16<br>[.11, .25]                   | <0.001  |                      |                       |
| MZ-R2                | 0.096                                |         |                      |                       | 0.097                                |         |                      |                       |

AOR = adjusted odds ratio, ARR = adjusted risk ratio, ARD = adjusted risk difference, MZ-R2 = McKelvey and Zavoina's pseudo R2.

(a) = adjusted for specialty, years in practice, and role. (Interaction term) = females are 1.18 times more likely (18% more likely) to have higher burnout than males when they experience higher childcare stress, by 7.9%.

|        | Model 3<br>Physicians only<br>N = 14,194 |         |                 |                 | Model 4<br>Physicians only<br>N = 14,194 |         |                 |                 |
|--------|------------------------------------------|---------|-----------------|-----------------|------------------------------------------|---------|-----------------|-----------------|
|        | AOR<br>[95% CI]                          | p-value | ARR<br>[95% CI] | ARD<br>[95% CI] | AOR<br>[95% CI]                          | p-value | ARR<br>[95% CI] | ARD<br>[95% CI] |
| Sex    |                                          |         |                 |                 |                                          |         |                 |                 |
| Female | 1.55                                     | <0.001  | 1.37            | 8.0%            | 1.68                                     | <0.001  | 1.37            | 8.0%            |

|                      |                      |        |                      |                       |                      |        |                      |                       |
|----------------------|----------------------|--------|----------------------|-----------------------|----------------------|--------|----------------------|-----------------------|
|                      | [1.43, 1.69]         |        | [1.29, 1.46]         | [6.5, 9.6]            | [1.53, 1.85]         |        | [1.29, 1.46]         | [6.5, 9.6]            |
| Childcare risk       |                      |        |                      |                       |                      |        |                      |                       |
| High risk            | 2.11<br>[1.92, 2.31] | <0.001 | 1.68<br>[1.58, 1.79] | 14.8%<br>[12.9, 16.8] | 2.47<br>[2.16, 2.83] | <0.001 | 1.68<br>[1.58, 1.79] | 14.8%<br>[12.9, 16.8] |
| Sex X Childcare risk |                      |        |                      |                       |                      |        |                      |                       |
| Female X High risk   |                      |        |                      |                       | 0.75<br>[.63, .89]   | 0.001  | 1.15<br>[1.05, 1.27] | 5.5%<br>[2.0, 9.0]    |
| Constant             | 0.26<br>[.13, .53]   | <0.001 |                      |                       | 0.25<br>[.12, .52]   | <0.001 |                      |                       |
| MZ-R2                | 0.062                |        |                      |                       | 0.064                |        |                      |                       |

AOR = adjusted odds ratio, ARR = adjusted risk ratio, ARD = adjusted risk difference, MZ-R2 = McKelvey and Zavoina's pseudo R2.

(a) = adjusted for specialty, and years in practice. (Interaction term) = females are 1.15 times more likely (15% more likely) to have higher anxiety/depression than males when they experience higher childcare stress, by 5.5%.
